# Supplementary material for: miR-937 serves as an inflammatory inhibitor in cigarette smoke extract-induced human bronchial epithelial cells by targeting IL1B and regulating TNF-α/IL-17 signaling pathway
Source: PubMed Central journal article supplement (PMC8231861; doi:10.18332/tid/138227), 2021-06-25
Supplement: TID-19-55-s1.pdf [file TID-19-55-s1.pdf]

**Figure S1 KEGG pathway enrichment analysis of overlapping DEGs**

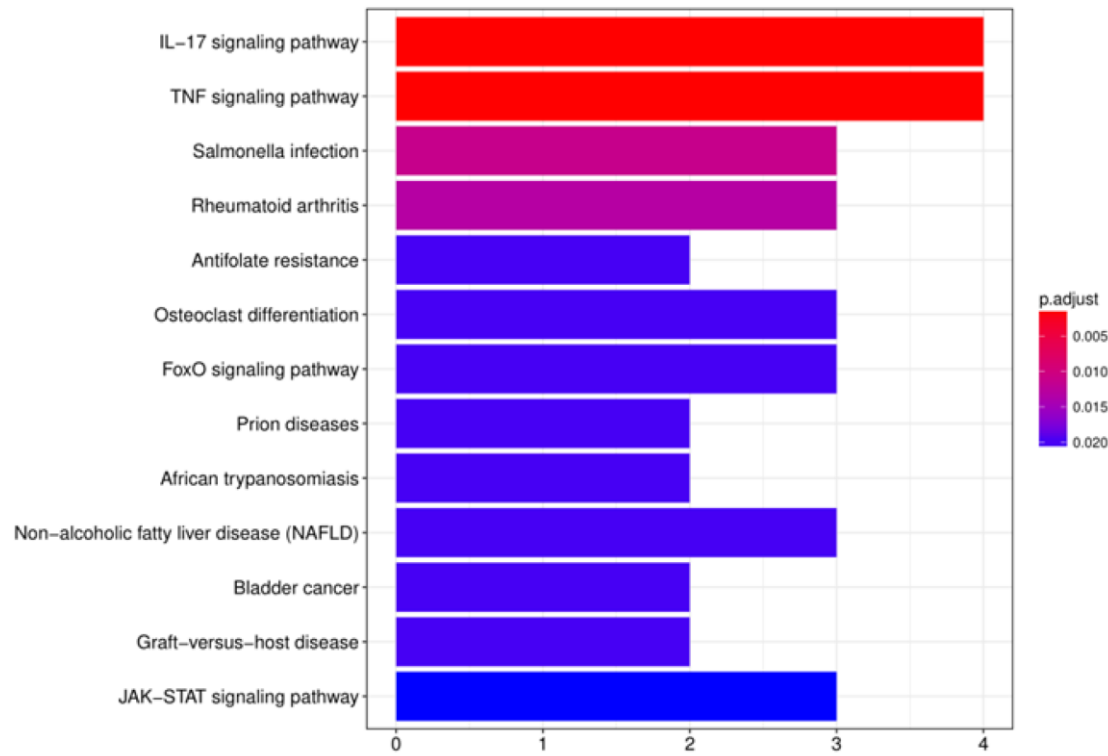

X axis represents number of genes enriched in KEGG pathways, y axis shows the names of pathways. Colors of columns represents the significance by adj.*p*-value.
